# Supplementary material for: Hybrid stochastic framework predicts efficacy of prophylaxis against HIV: An example with different dolutegravir prophylaxis schemes
Source: PLOS journal article supplement (doi:10.1371/journal.pcbi.1006155), 2018-06-14
Supplement: S3 (10.1371/journal.pcbi.1006155.s003) [file journal.pcbi.1006155.s003]

1 **Supplementary Text S1:**  
2 **Pseudo-code of the adapted EXTRANDE algorithm**

```

1 Precomputation :
2 Compute target-site pharmacokinetic profile  $D_s$  for  $s \in [0, T]$ 
3 Initialization :
4  $t = 0$  # Initial time of the system
5  $Y = Y_0$  # Initial state of the stochastic system
6 while true do
    # Determine upper bound for the sum of reaction propensities
7     $B = a_0(Y_t, \emptyset) = \sum_{k=1}^K a_k(Y_t, \emptyset)$  # Sum of reaction propensities in absence of antivirals
    # Generate putative reaction time i.e  $\tau \sim \text{Exp}(1/B)$  :
8     $r_1 \sim \mathcal{U}(0, 1)$  # Sample from a uniform distribution
9     $\tau \leftarrow \frac{1}{B} \cdot \log\left(\frac{1}{r_1}\right)$  # Transformation to an exponential distribution
10    $t \leftarrow t + \tau$  # Update time
11    $a_0 \leftarrow \sum_{k=1}^K a_k(Y_t, D_t)$  # Sum of all stochastic reaction propensities at time  $t$ 
12    $r_2 \sim \mathcal{U}(0, 1)$  # Sample from a uniform distribution
13   if  $a_0 \geq B \cdot r_2$  then
       # 'Acceptance Step' - a reaction fires changing the state.
       # Choose the reaction, i.e.
       the smallest positive integer  $j$  such that  $\sum_{k=1}^j a_k(Y_t, D_t) \geq B \cdot r_2$ 
14       if reaction R4 or R5 is chosen then
15            $r_3 \sim \mathcal{U}(0, 1)$ 
16           if  $r_3 \leq p_{M|a_4}$ , respectively  $r_3 \leq p_{L|a_5}$  then
17               # a long lived/latently infected cell emerged.
18               Stop the simulation
19           end
20       end
21        $Y_t \leftarrow Y_t + v_j$  # Update the state of the system
22       if  $Y_t = \mathbf{0}$  then
           # Extinction event - the trajectory has reached the absorbing extinction state.
           Stop the simulation
23       else
           # Compute the extinction probability of state  $Y_t$  and drug concentration  $D_{max}$ 
           Compute  $D_{max}$  for the current time  $t$ 
24           if  $P_E(Y_t, D_{max}) < \varepsilon$  then
               # Infection event
               Stop the simulation
25           else
               # The trajectory at time  $t$  is within the extinction simplex.
26           end
27       end
28   else
       # 'Rejection Step' - Extra reaction fires without changing the state.
29   end
30 end
31 end
32 end
33 end

```

**Algorithm 1:** Adapted Extra Reaction Algorithm for Networks in Dynamic Environments (EX-TRANDE) for estimating the infection/extinction probability for time-varying drug effects.
